# Supplementary material for: A general synthesis strategy of multi-metallic nanoparticles within mesoporous titania via in situ photo-deposition
Source: Royal Society of Chemistry journal article supplement (doi:10.1039/c4ta02970d), 2014-08-27
Supplement: c4ta02970d1.pdf [file c4ta02970d1.pdf]

## Electronic Supplementary Information

### A general synthetic strategy of multi-metallic nanoparticles within mesoporous titania *via in situ* photo-deposition

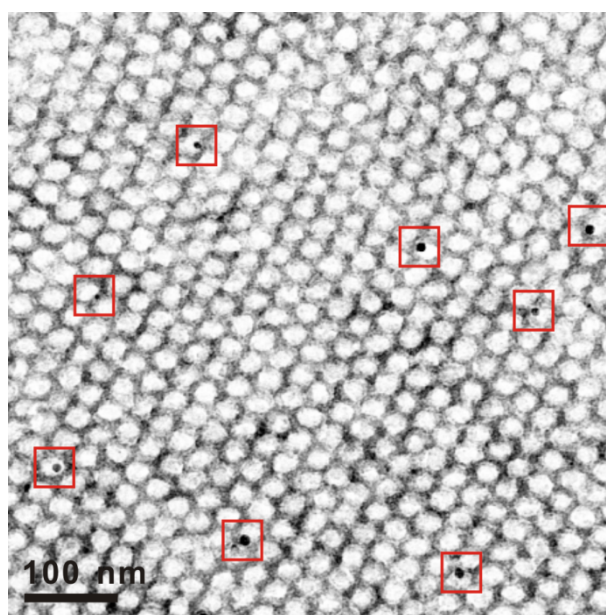

**Fig. S1** TEM image of Au<sub>50</sub>Pt<sub>50</sub>/EP-TiO<sub>2</sub> after the photo-deposition. In the image, Au<sub>50</sub>Pt<sub>50</sub> NPs are located within the mesocages of EP-TiO<sub>2</sub> (in red squares).

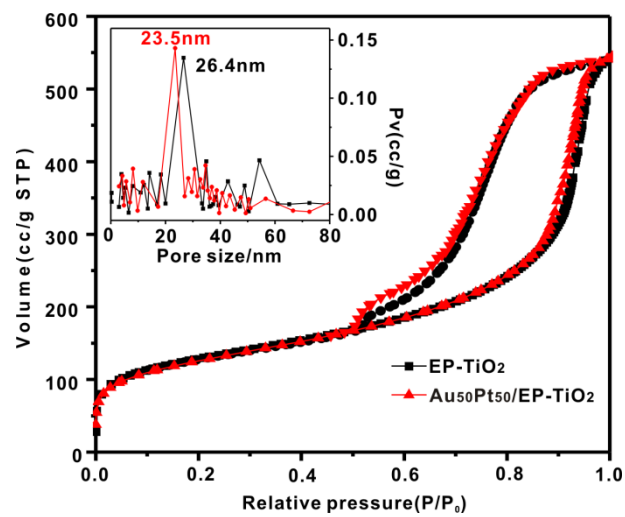

**Fig. S2** N<sub>2</sub> adsorption-desorption isotherms of EP-TiO<sub>2</sub> and Au<sub>50</sub>Pt<sub>50</sub>/EP-TiO<sub>2</sub>.

**Table S1** Physico-chemical properties of EP-TiO<sub>2</sub> and Au<sub>50</sub>Pt<sub>50</sub>/EP-TiO<sub>2</sub><sup>a</sup>.

| samples                                                | Pore size | Pore volume                        | Surface area                      |
|--------------------------------------------------------|-----------|------------------------------------|-----------------------------------|
|                                                        | (nm)      | (cm <sup>3</sup> g <sup>-1</sup> ) | (m <sup>2</sup> g <sup>-1</sup> ) |
| EP-TiO <sub>2</sub>                                    | 26.4      | 0.70                               | 445                               |
| Au <sub>50</sub> Pt <sub>50</sub> /EP-TiO <sub>2</sub> | 23.5      | 0.68                               | 437                               |

<sup>a</sup> Pore size and pore volumes are determined from the N<sub>2</sub> adsorption isotherms.

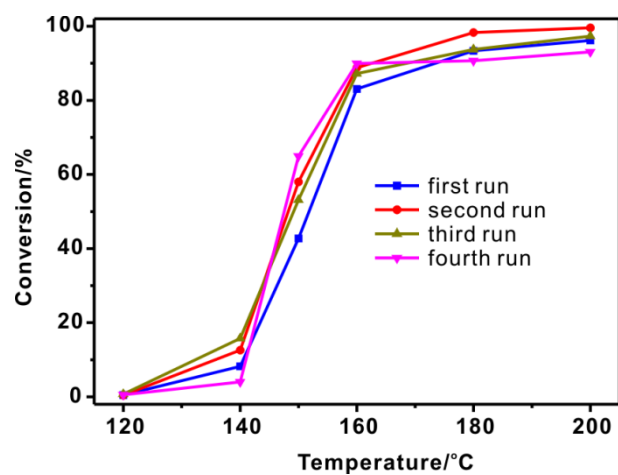

**Fig. S3** Clycling experiments of 4% Au<sub>50</sub>Pt<sub>50</sub>/EP-TiO<sub>2</sub> after annealing at 350 °C for the *n*-hexane combustion.

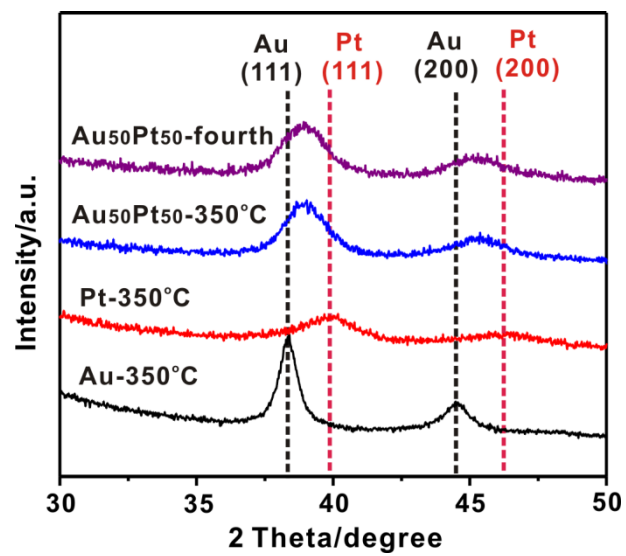

**Fig. S4** XRD patterns of Au<sub>50</sub>Pt<sub>50</sub>/EP-TiO<sub>2</sub> after annealing at 350 °C and after four runs of catalysis.
